# Supplementary material for: Quaternized Chitosan-Capped Mesoporous Silica Nanoparticles as Nanocarriers for Controlled Pesticide Release
Source: Nanomaterials (Basel). 2016 Jun 28;6(7):126. doi: 10.3390/nano6070126 (PMC5224598; doi:10.3390/nano6070126)
Supplement: Supplementary file 1 [file nanomaterials-06-00126-s001.pdf]

# Supplementary Materials: Quaternized Chitosan-Capped Mesoporous Silica Nanoparticles as Nanocarriers for Controlled Pesticide Release

Lidong Cao, Huirong Zhang, Chong Cao, Jiakun Zhang, Fengmin Li and Qiliang Huang

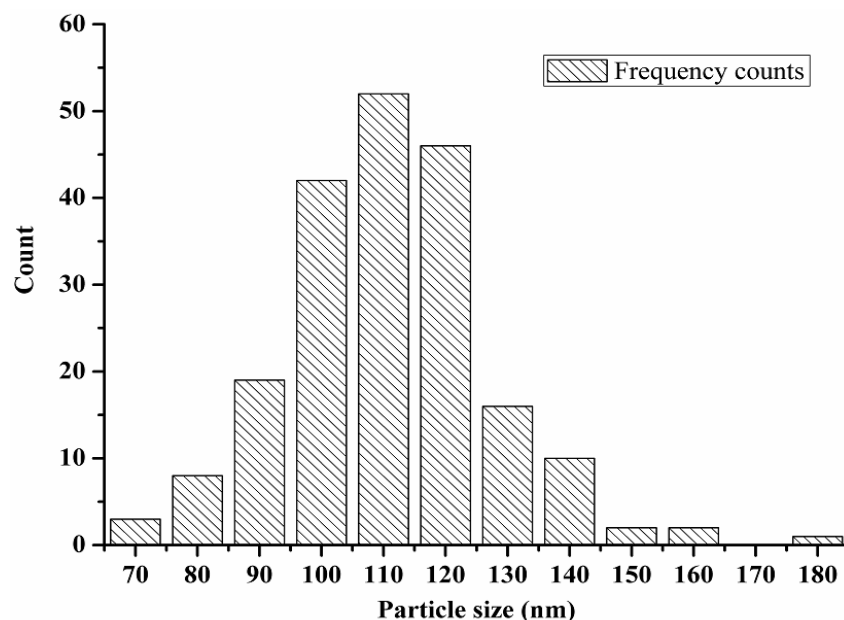

**Figure S1.** The distribution of particle size of Mesoporous silica nanoparticle (MSNs) based on the specimen numbers of 201.

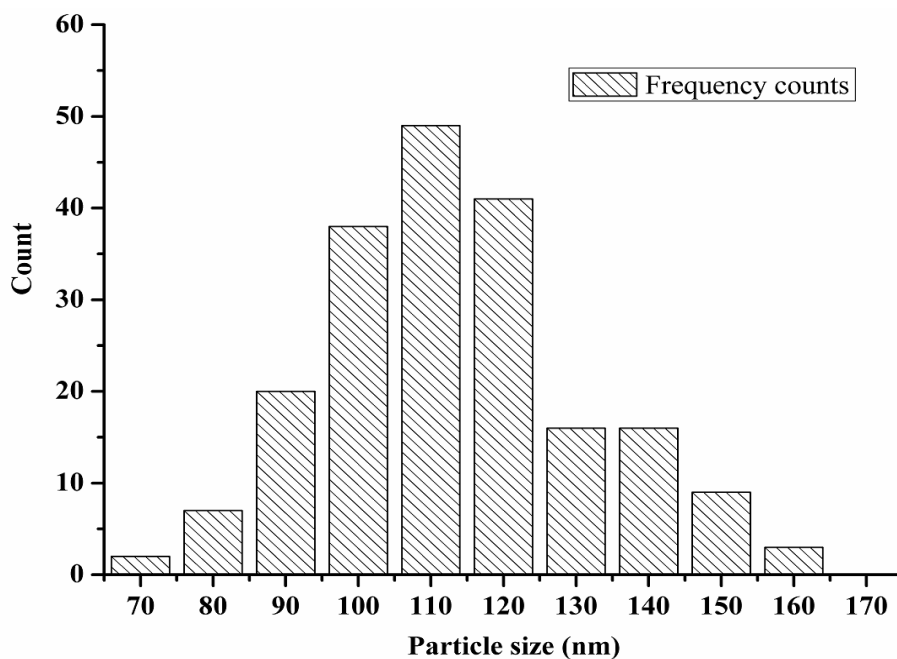

**Figure S2.** The distribution of particle size of pyraclostrobin-loaded HTCC-capped MSNs (Py@MSNs-HTCC) based on the specimen numbers of 201. HTCC: *N*-(2-Hydroxyl)propyl-3-trimethylammonium chitosan chloride.

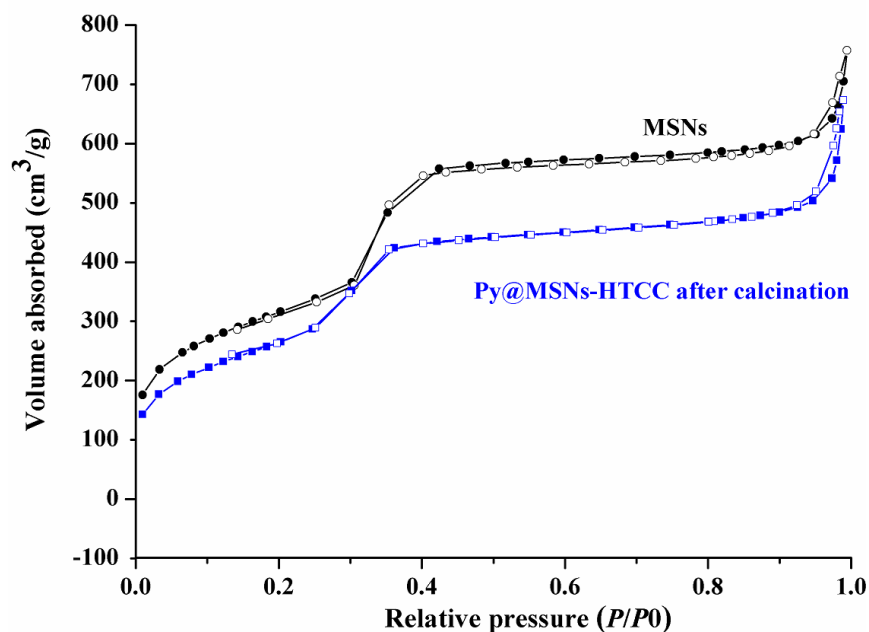

Figure S3. Nitrogen adsorption-desorption isotherms of MSNs and Py@MSNs-HTCC after calcination.

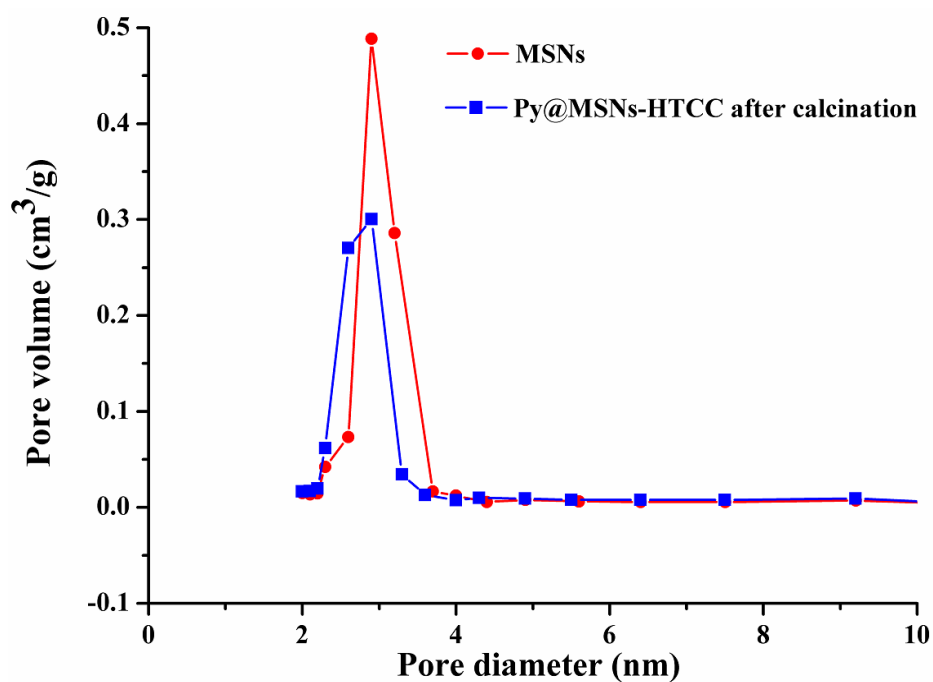

Figure S4. Barrett-Joyner-Halenda (BJH) pore-size-distribution curves of MSNs and Py@MSNs-HTCC after calcination.

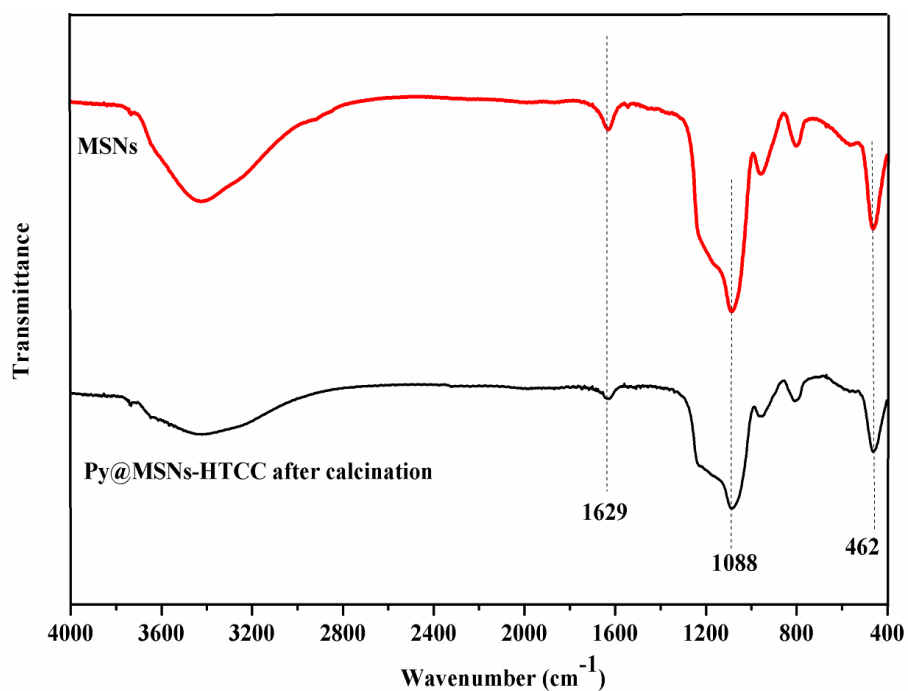

Figure S5. Fourier transform infrared (FTIR) of MSNs and Py@MSNs-HTCC after calcination.

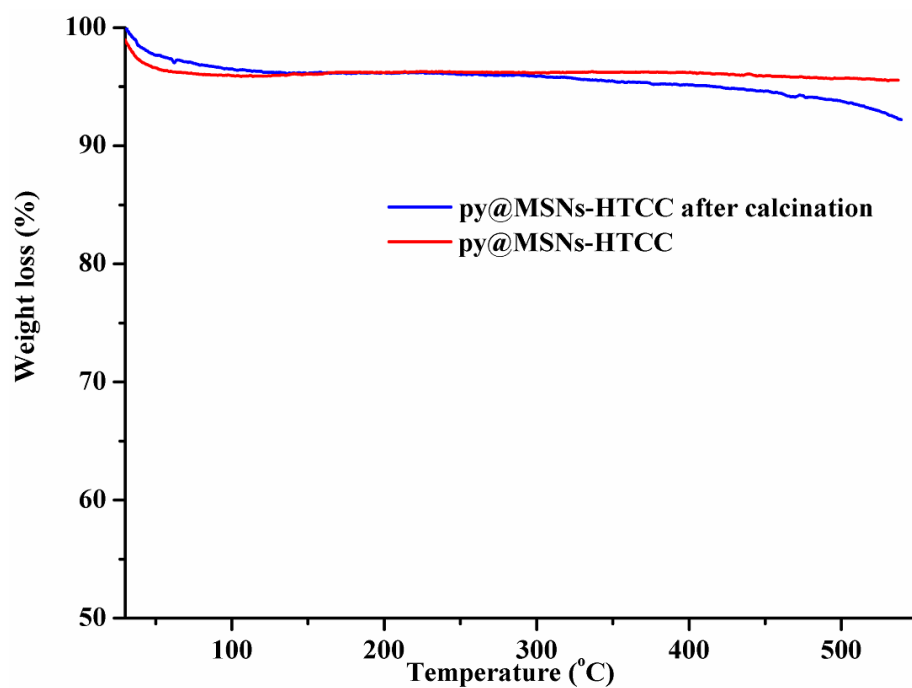

Figure S6. Thermogravimetric analysis (TGA) of MSNs and Py@MSNs-HTCC after calcination.

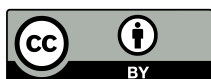

© 2016 by the authors. Submitted for possible open access publication under the terms and conditions of the Creative Commons Attribution (CC-BY) license (<http://creativecommons.org/licenses/by/4.0/>).
